# Supplementary material for: Cellular Internalisation of an Inositol Phosphate Visualised by Using Fluorescent InsP5
Source: PubMed Central journal article supplement — Chembiochem. 2013 Dec 6;15(1):57–67. doi: 10.1002/cbic.201300583 (PMC4159588; doi:10.1002/cbic.201300583), 2013-12-06

**CHEMBIOCHEM**

## Supporting Information

© Copyright Wiley-VCH Verlag GmbH & Co. KGaA, 69451 Weinheim, 2013

### **Cellular Internalisation of an Inositol Phosphate Visualised by Using Fluorescent InsP<sub>5</sub>**

Andrew M. Riley,<sup>[a]</sup> Sabine Windhorst,<sup>[b]</sup> Hong-Yin Lin,<sup>[b]</sup> and Barry V. L. Potter\*<sup>[a]</sup>

cbic\_201300583\_sm\_miscellaneous\_information.pdf

# Supporting Information

| <b>Table of Contents</b> |                                                                                          | <b>Page</b> |
|--------------------------|------------------------------------------------------------------------------------------|-------------|
| Figure S1                | Z-stack analysis of cellular adhesion and uptake of FAM-InsP <sub>5</sub> ( <b>5</b> )   | 2           |
| Figure S2                | Z-stack analysis uptake of FAM-InsP <sub>5</sub> ( <b>5</b> ); effect of cell confluence | 3           |
| Figure S3                | Z-stack analysis uptake of FAM-InsP <sub>5</sub> ( <b>5</b> ); time-dependence           | 4           |
| Compound <b>6</b>        | <sup>1</sup> H NMR and <sup>13</sup> C NMR spectra                                       | 5           |
| Compound <b>7</b>        | <sup>1</sup> H NMR and <sup>13</sup> C NMR spectra                                       | 6           |
| Compound <b>8</b>        | <sup>1</sup> H NMR and <sup>13</sup> C NMR spectra                                       | 7           |
| Compound <b>9</b>        | <sup>1</sup> H NMR and <sup>13</sup> C NMR spectra                                       | 8           |
| Compound <b>10</b>       | <sup>1</sup> H NMR and <sup>13</sup> C NMR spectra                                       | 9           |
| Compound <b>10</b>       | <sup>31</sup> P NMR and <sup>19</sup> F NMR spectra                                      | 10          |
| Compound <b>4</b>        | <sup>1</sup> H NMR spectrum                                                              | 11          |
| Compound <b>4</b>        | <sup>13</sup> C NMR and <sup>31</sup> P NMR spectra                                      | 12          |
| Compound <b>5</b>        | <sup>1</sup> H NMR spectrum and analytical RP-HPLC trace                                 | 13          |
| Compound <b>5</b>        | <sup>13</sup> C NMR and <sup>31</sup> P NMR spectra                                      | 14          |

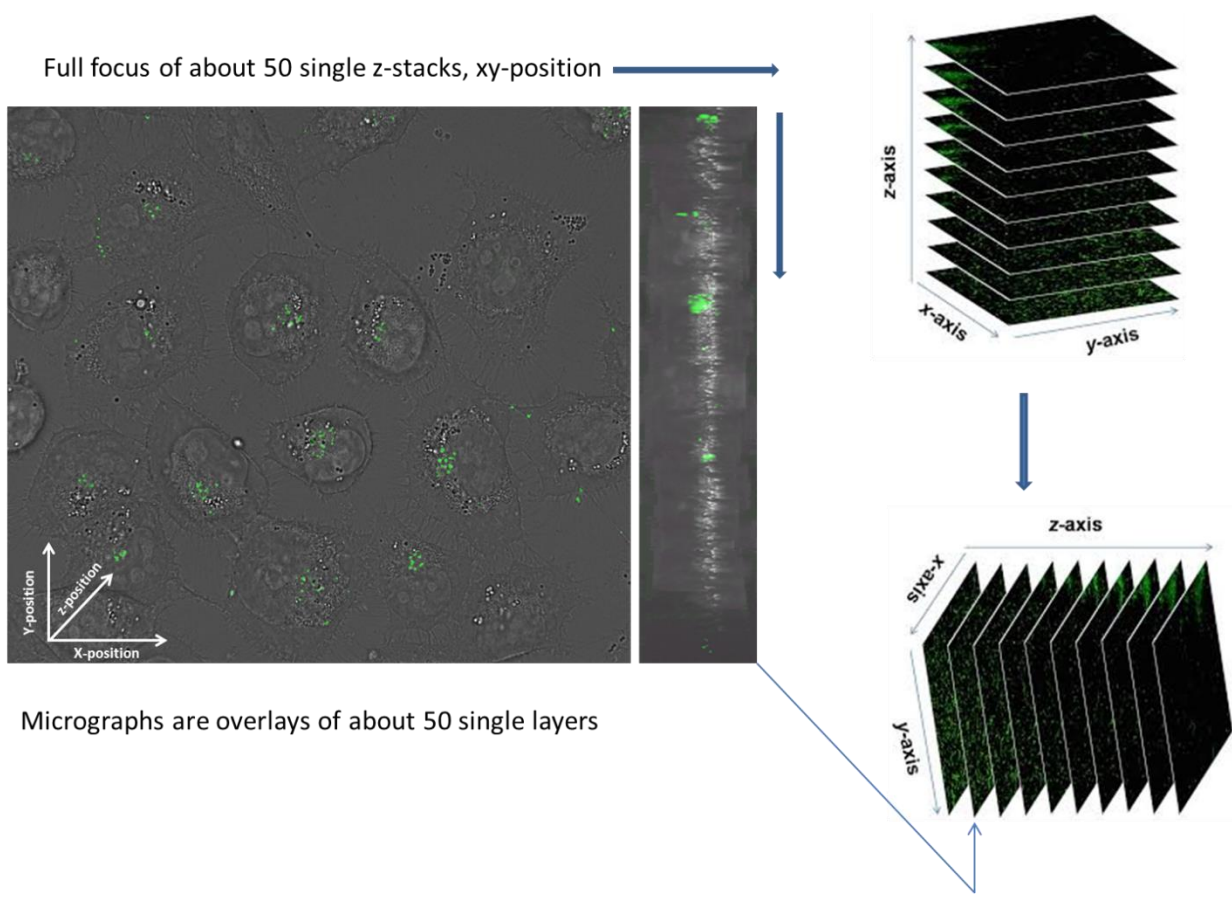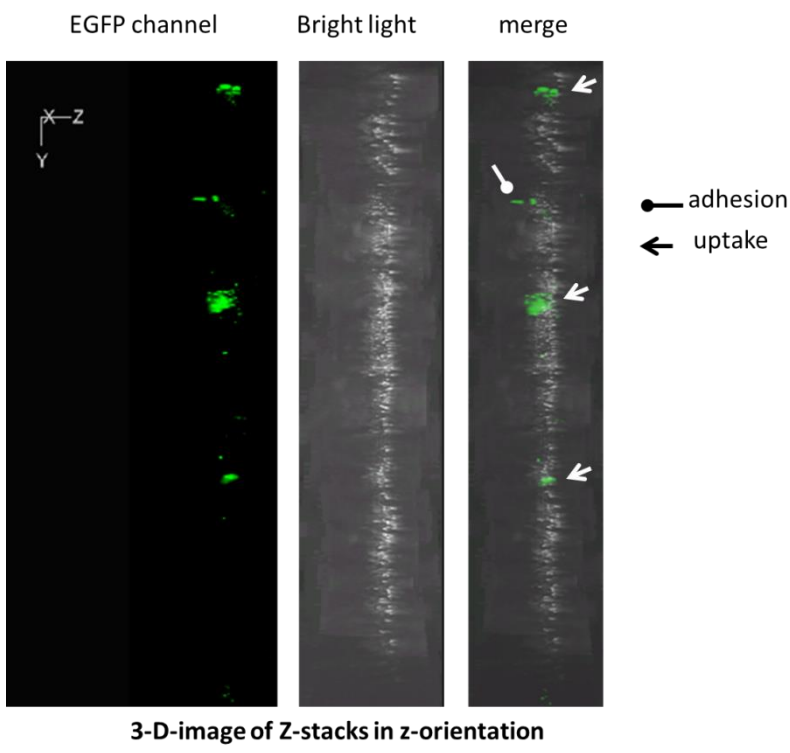

**Figure S1.** H1299 cells were treated with **5** (20  $\mu\text{M}$ ) for 16 h. Washed cells were fixed and analysed by fluorescence microscopy. Z-stacks and 3D-reconstitutions of Z-stacks were performed and uptake of **5** was analysed in micrographs that were rotated in the Z-axis by 90°. Green dots at the outer layer were defined as adhesion (● —) and dots in the middle of the cell layer as uptake (◀).

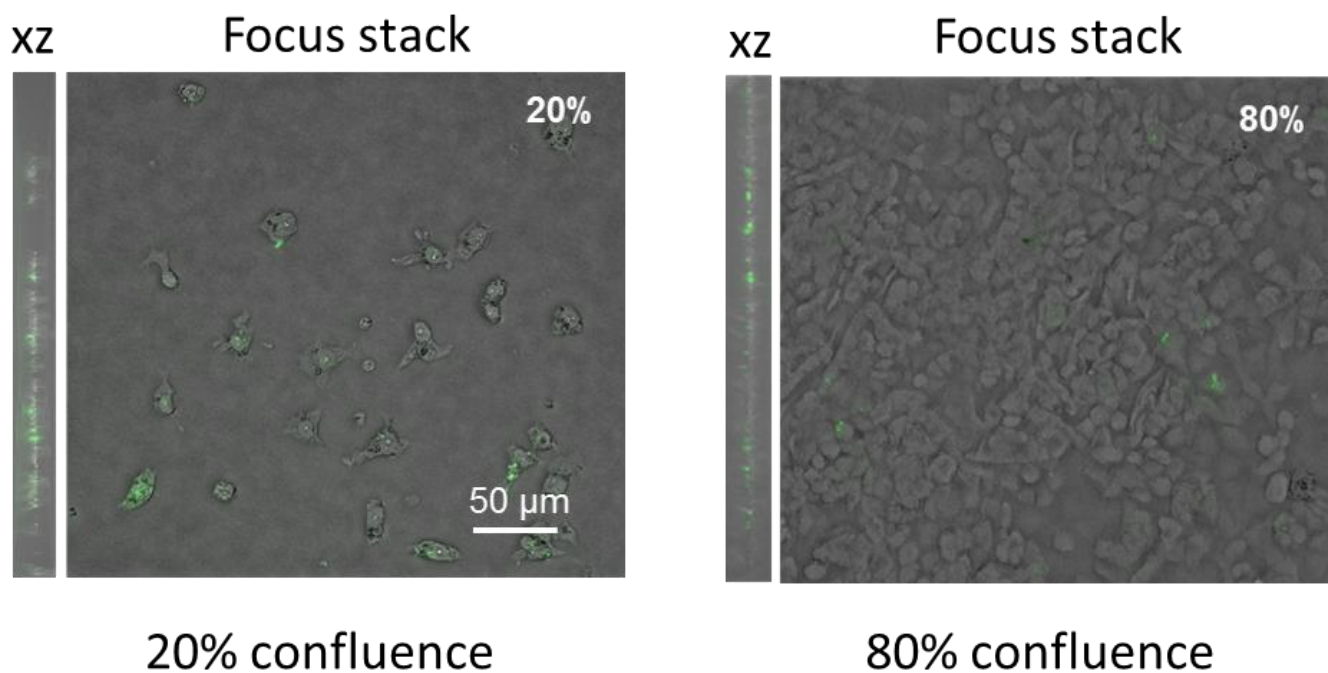

**Figure S2.** Uptake of FAM-InsP<sub>5</sub> (**5**) in H1299 cells. H1299 cells were grown to 20% or 80% confluence and treated with **5** (20 μM). After 16 h, washed cells were with paraformaldehyde and embedded in Fluoromount-G medium. Z-stacks of bright and fluorescence light micrographs were performed. Shown are the xz-layer and focus stackings of bright and fluorescence light overlays in a magnification of 10 x 20. Five micrographs per series (20% or 80% confluence) were performed and whole cell numbers and numbers of green fluorescent cells of the middle cell layers were counted to calculate % cellular uptake of **5**.

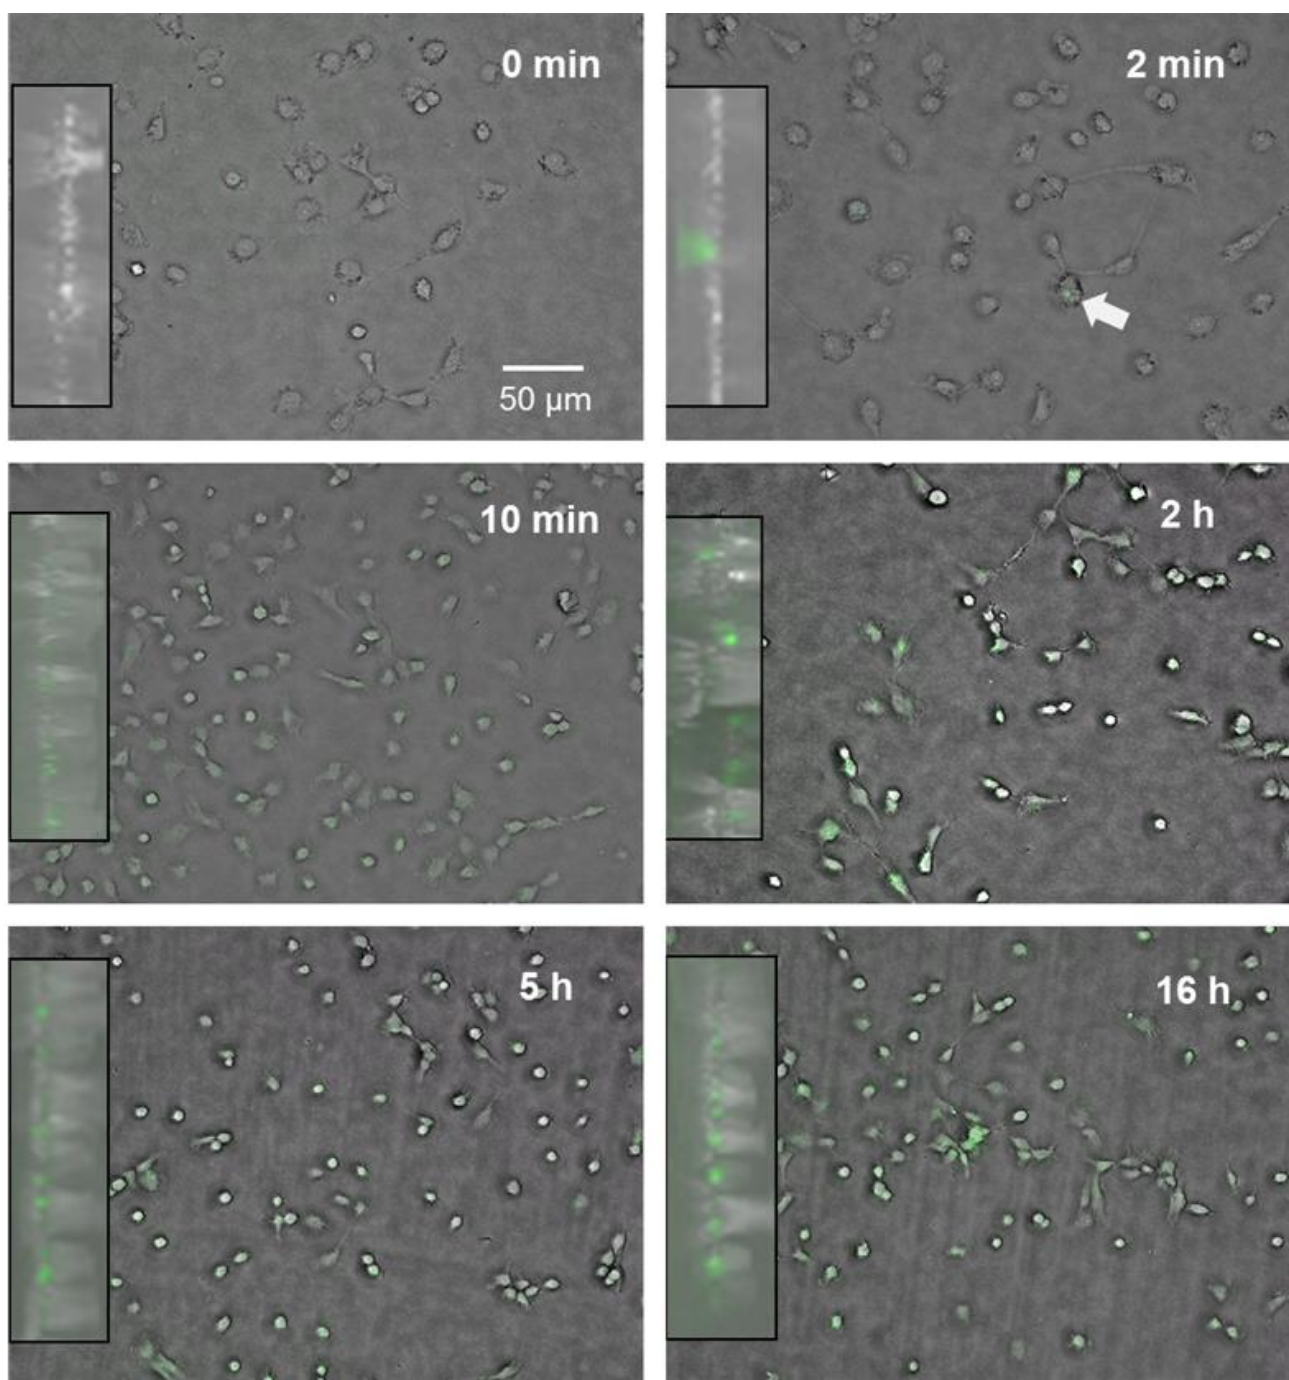

**Figure S3.** Time dependence of FAM-InsP<sub>5</sub> (**5**) uptake into H1299 cells. H1299 cells were grown to 50% confluence and treated with 20 μM **5** for the time points as indicated in the figure. Then, the washed cells were embedded in Fluoromount-G medium and uptake of **5** was determined as described above. To illustrate uptake over time, the xz-layers of representative micrographs are shown in higher magnification (left panels). After 2 min of incubation, only cell surface aggregates of **5** were visible (indicated by an arrow) and after 10 min, the first intracellular aggregates of **5** were detected. For each time point, at least five micrographs were evaluated, and % cellular uptake of **5** was calculated as before.



5-O-Benzoyl-1,6:3,4-bis-[O-(2,3-dimethoxybutane-2,3-diyl)]-myo-inositol (7)

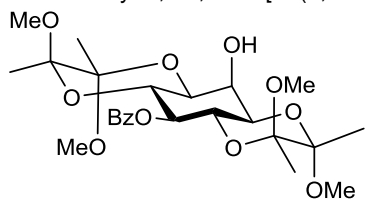

<sup>1</sup>H NMR (400 MHz, CDCl<sub>3</sub>)

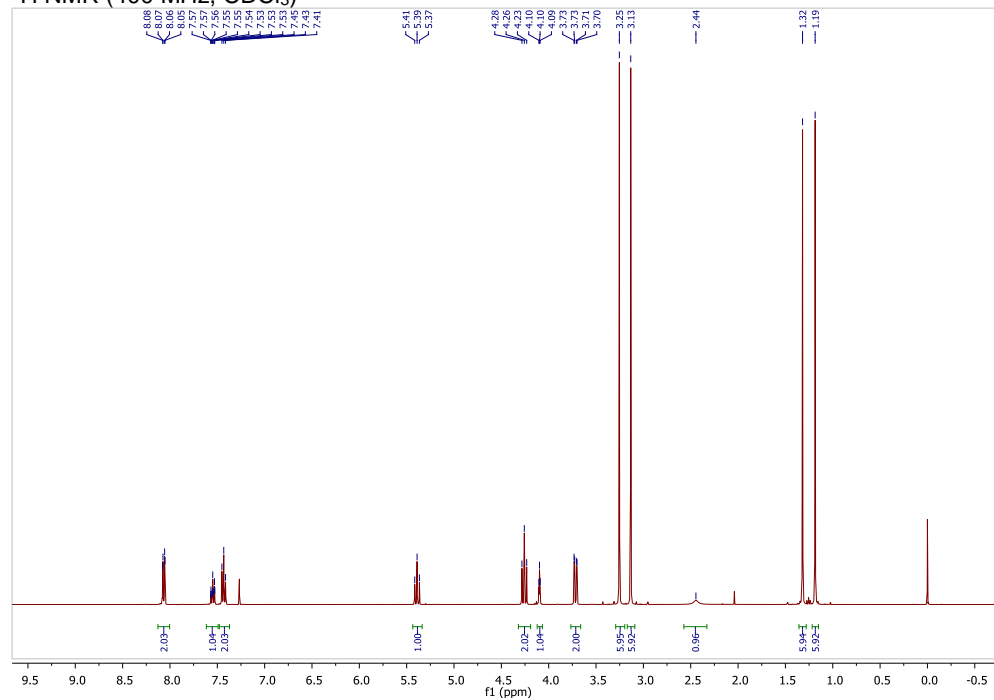

<sup>13</sup>C NMR (100 MHz, CDCl<sub>3</sub>)

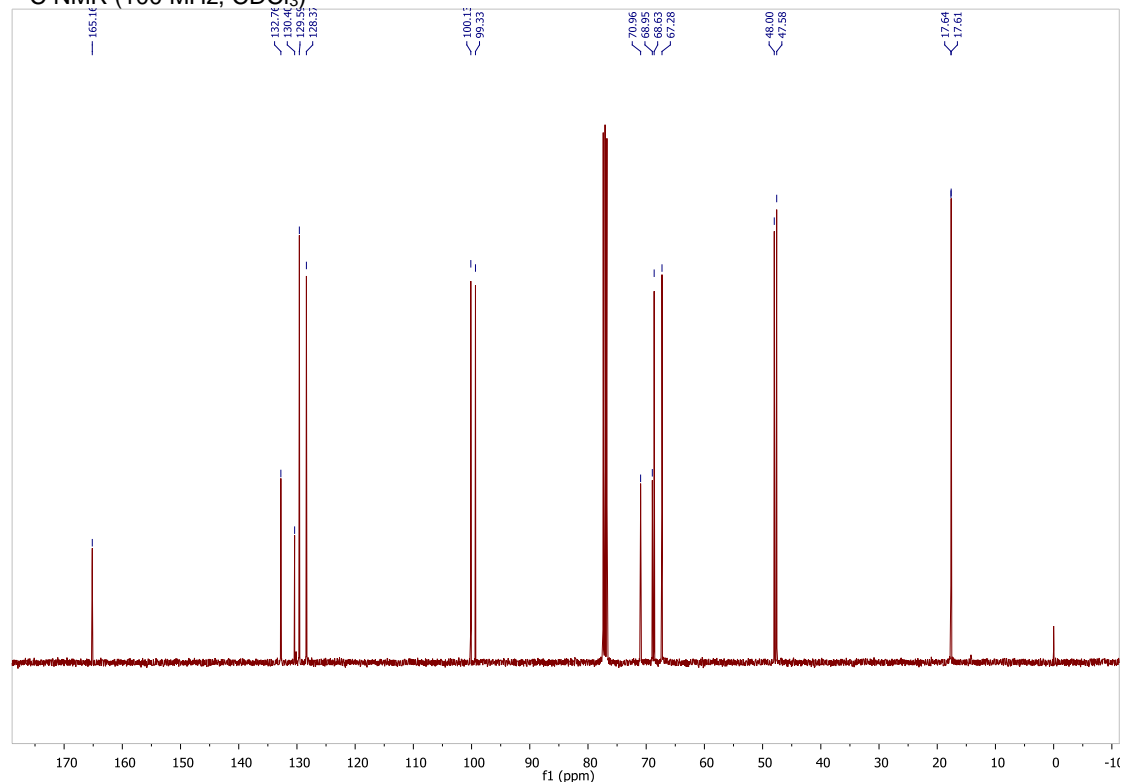

5-O-Benzoyl-2-O-cyanomethyl-1,6:3,4-bis-[O-(2,3-dimethoxybutane-2,3-diyl)]-myo-inositol (**8**)

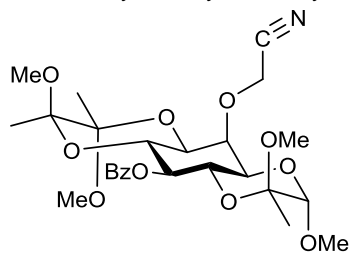

$^1\text{H NMR}$  (400 MHz,  $\text{CDCl}_3$ )

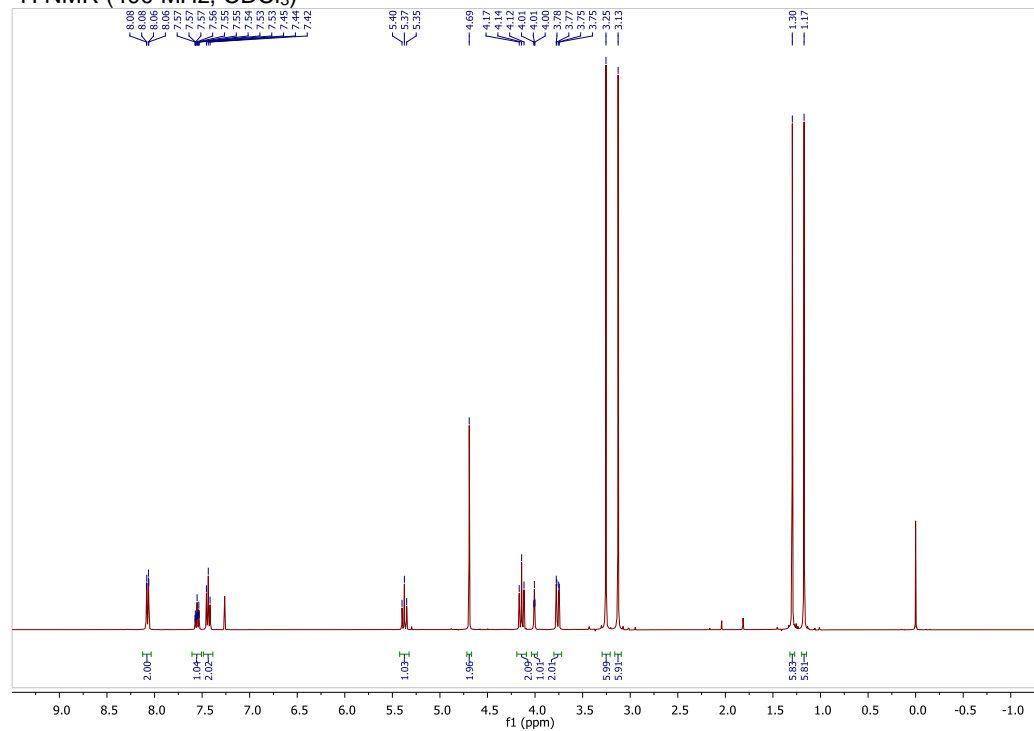

$^{13}\text{C NMR}$  (100 MHz,  $\text{CDCl}_3$ )

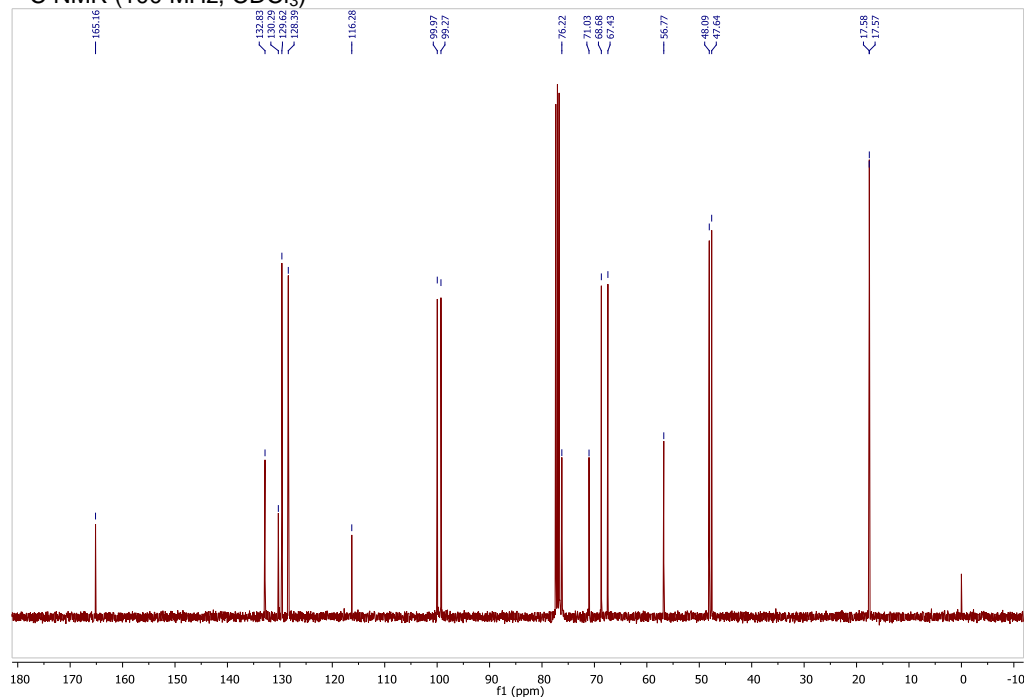



2-O-[2-(2,2,2-Trifluoroacetyl)amino]ethyl]-1,6:3,4-bis-[O-(2,3-dimethoxybutane-2,3-diy)]-myo-inositol (**9**)

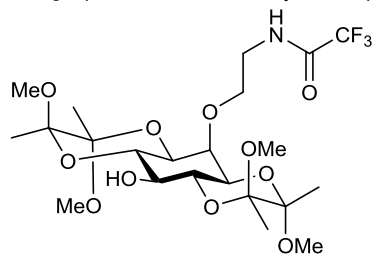

<sup>1</sup>H NMR (400 MHz, CDCl<sub>3</sub>)

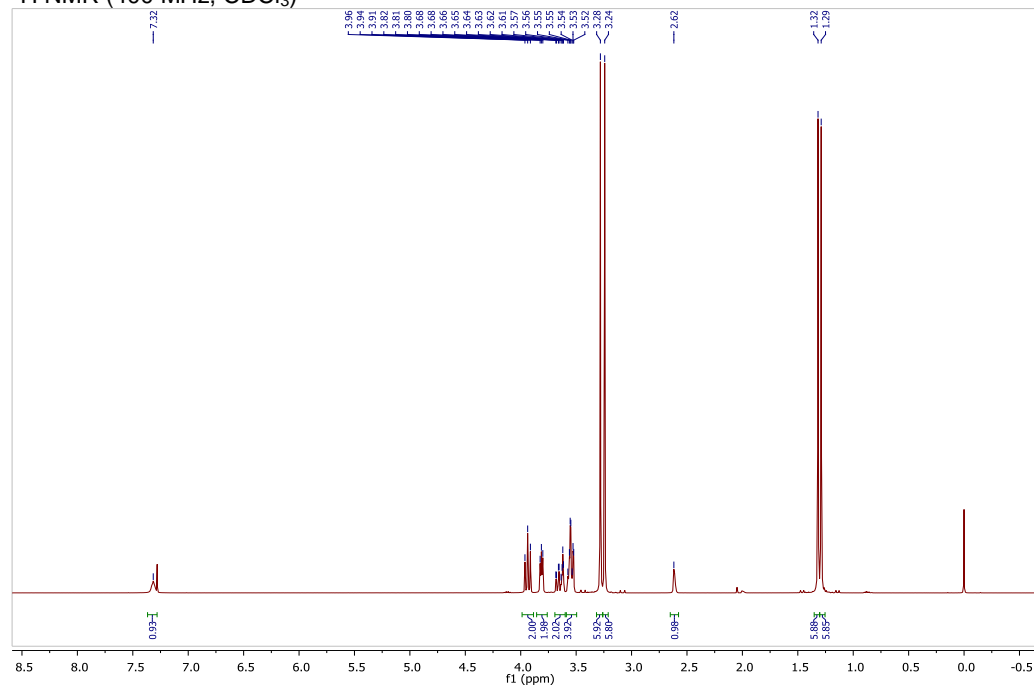

<sup>13</sup>C NMR (100 MHz, CDCl<sub>3</sub>)

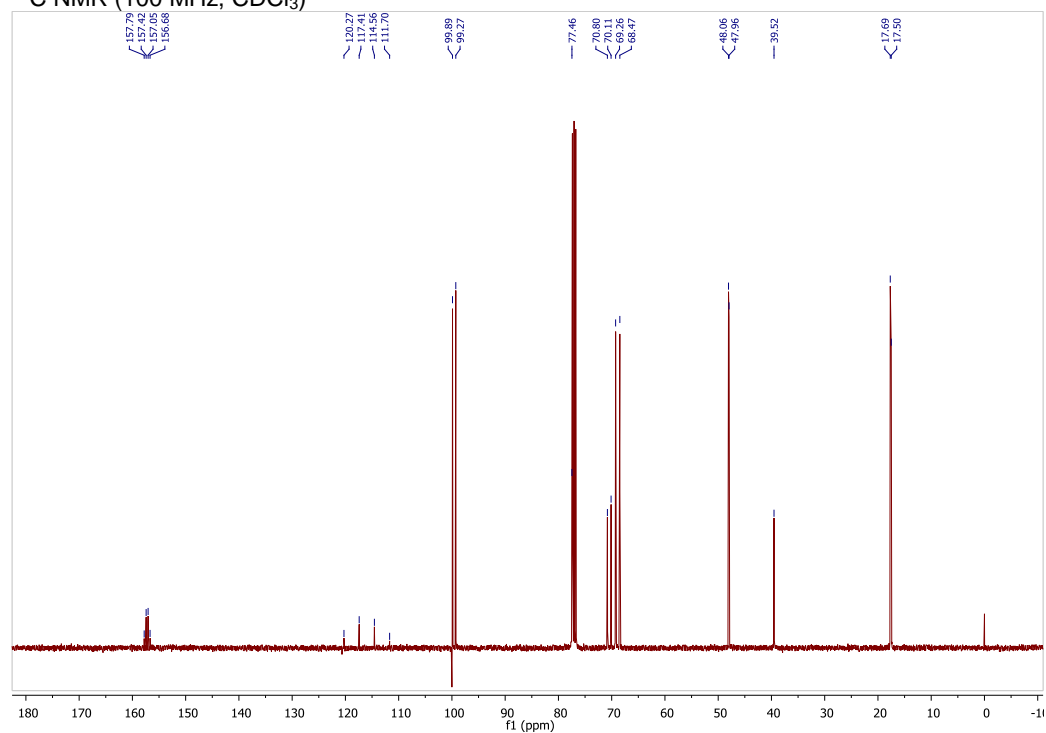

2-O-[2-(2,2,2-Trifluoroacetyl)amino]ethyl]-*myo*-inositol 1,3,4,5,6-pentakis (dibenzylphosphate) (**10**)

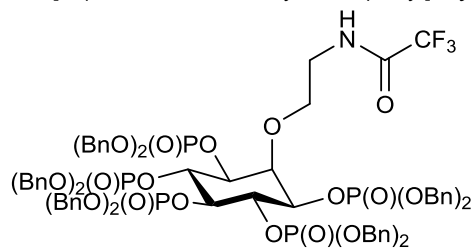

<sup>1</sup>H NMR (400 MHz, CDCl<sub>3</sub>)

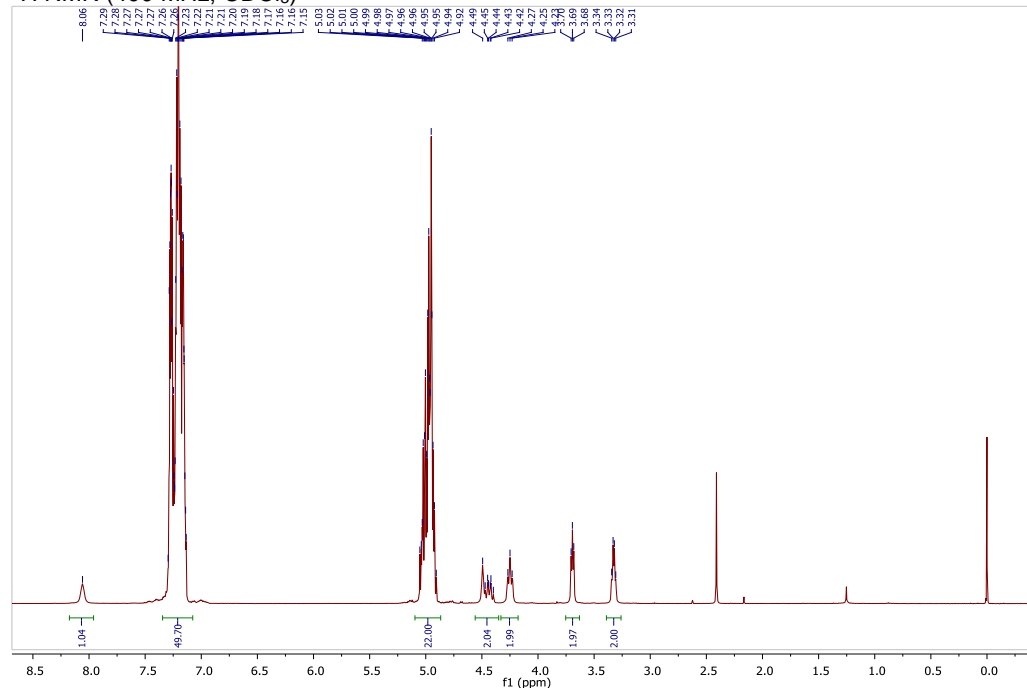

<sup>13</sup>C NMR (100 MHz, CDCl<sub>3</sub>)

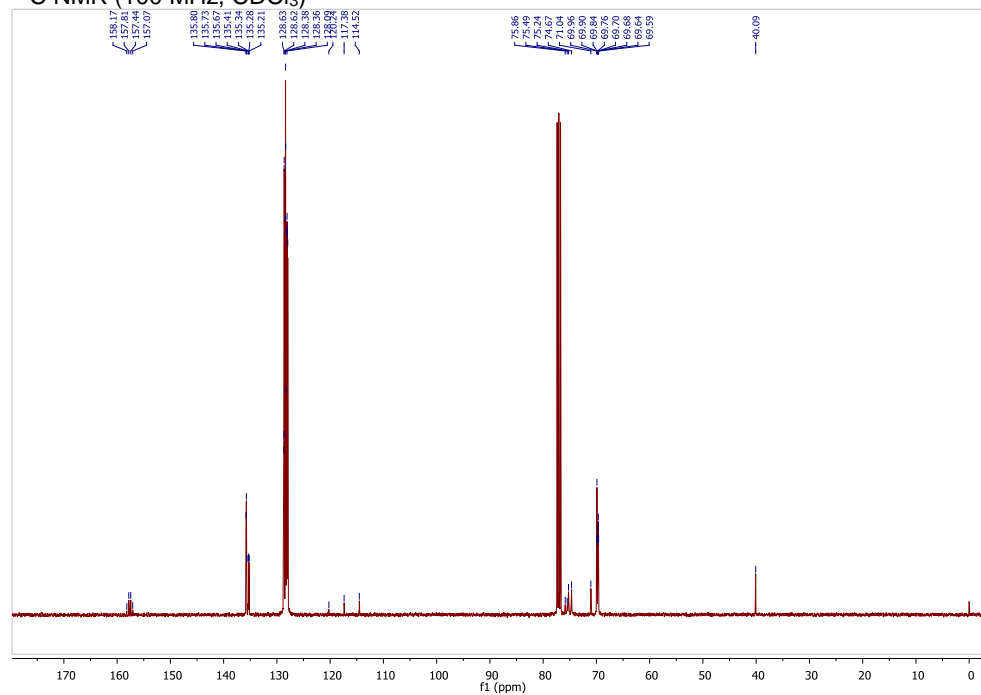

2-O-[2-(2,2,2-Trifluoroacetyl)amino]ethyl]-*myo*-inositol 1,3,4,5,6-pentakis (dibenzylphosphate) (**10**)

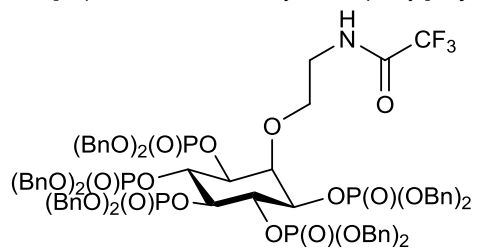

$^{31}\text{P}$  NMR (162 MHz,  $\text{CDCl}_3$ )

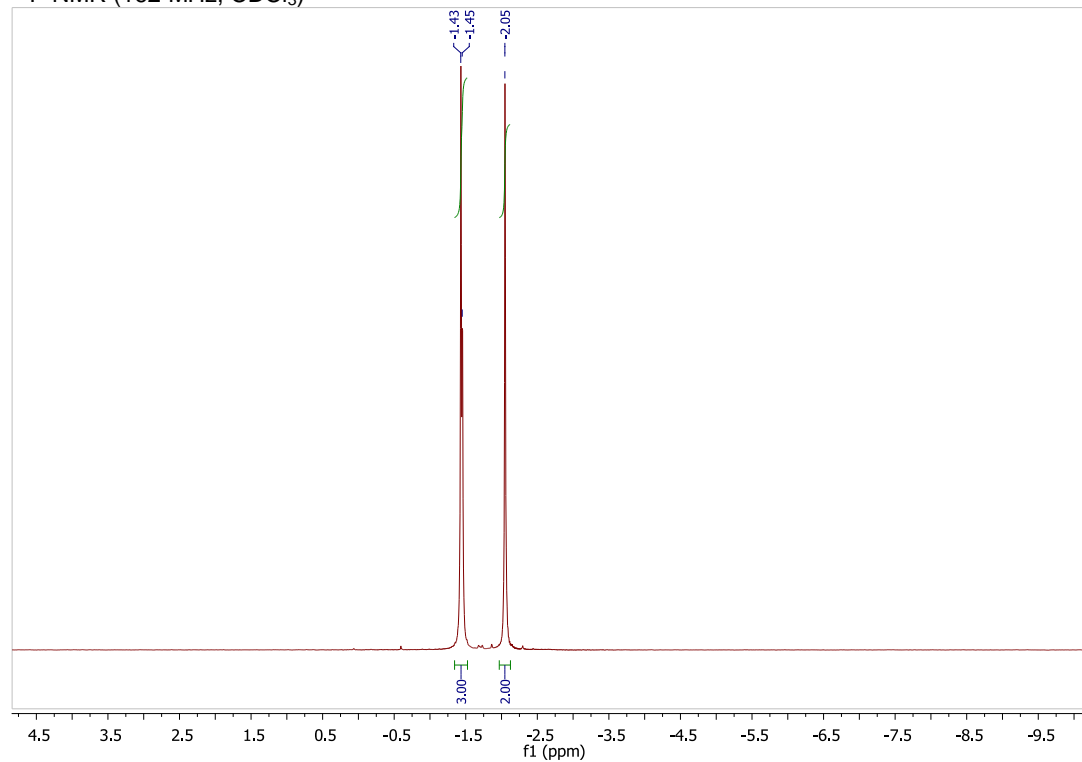

$^{19}\text{F}$  NMR (376 MHz,  $\text{CDCl}_3$ ):

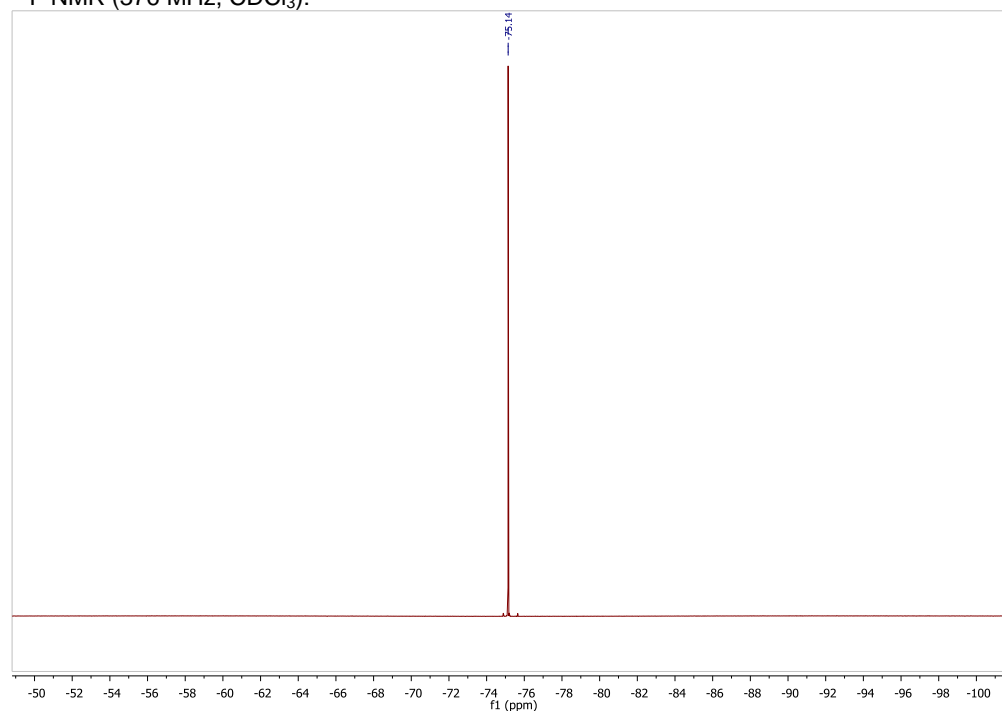

2-O-(2-Aminoethyl)-*myo*-inositol 1,3,4,5,6-pentakisphosphate (4)

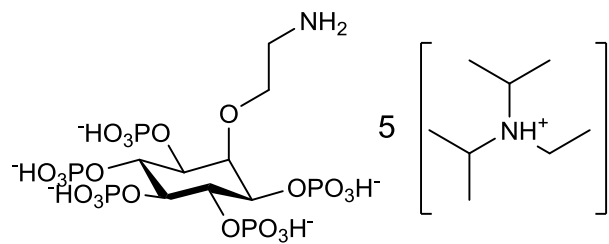

$^1\text{H}$  NMR (400 MHz,  $\text{D}_2\text{O}$ )

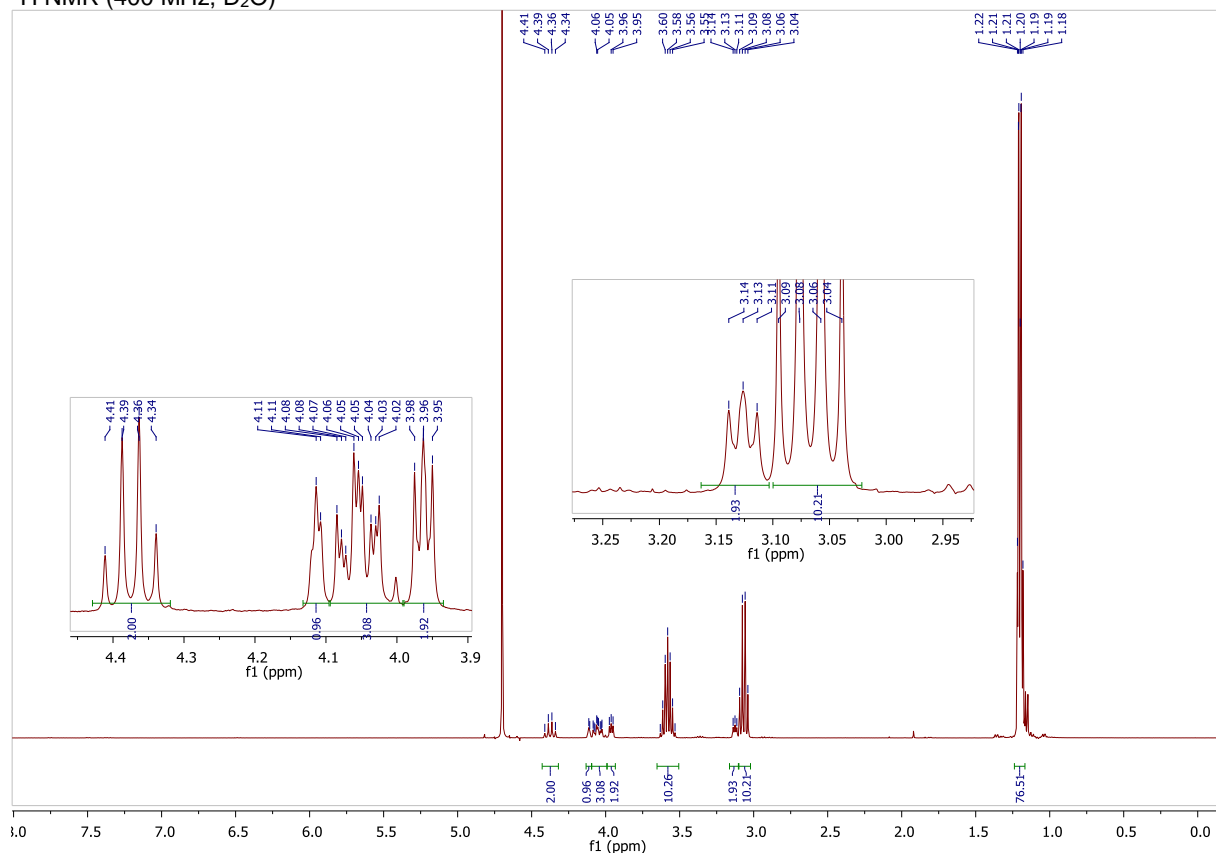

2-O-(2-Aminoethyl)-*myo*-inositol 1,3,4,5,6-pentakisphosphate (4)

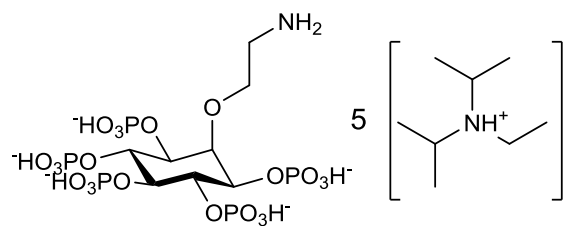

$^{13}\text{C}$  NMR (100 MHz,  $\text{D}_2\text{O}$ )

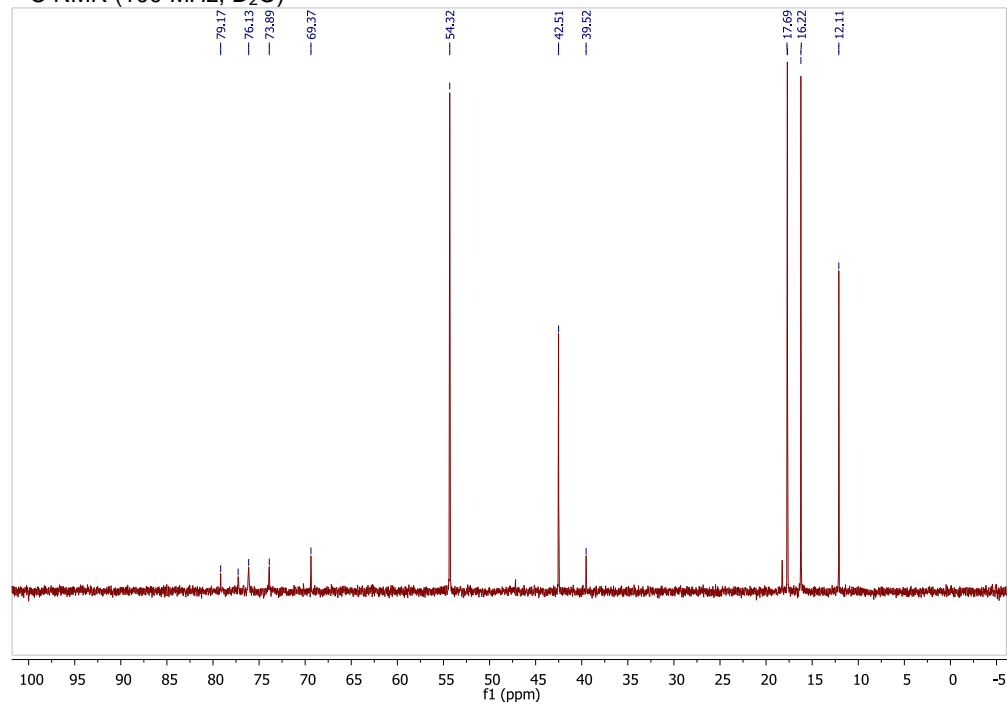

$^{31}\text{P}$  NMR (162 MHz,  $\text{D}_2\text{O}$ )

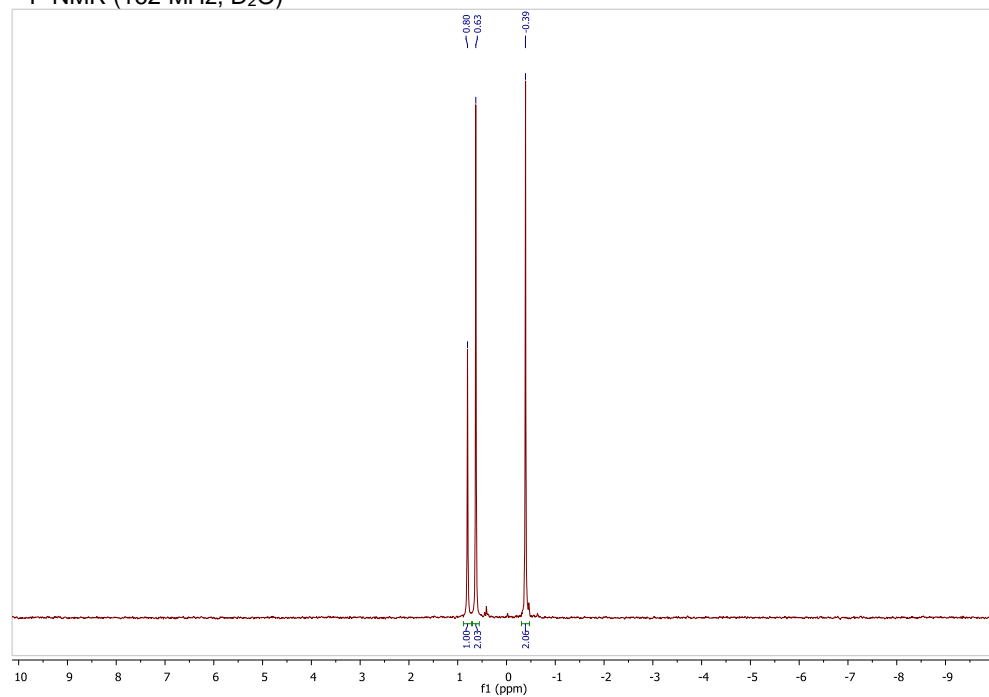

2-O-(2-(5-Fluoresceinylcarboxy)-aminoethyl)-myo-inositol 1,3,4,5,6-pentakisphosphate (5)

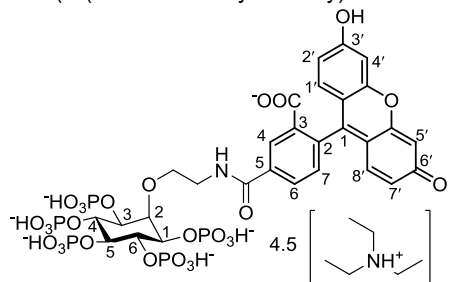

$^1\text{H}$  NMR (400 MHz,  $\text{D}_2\text{O}$ )

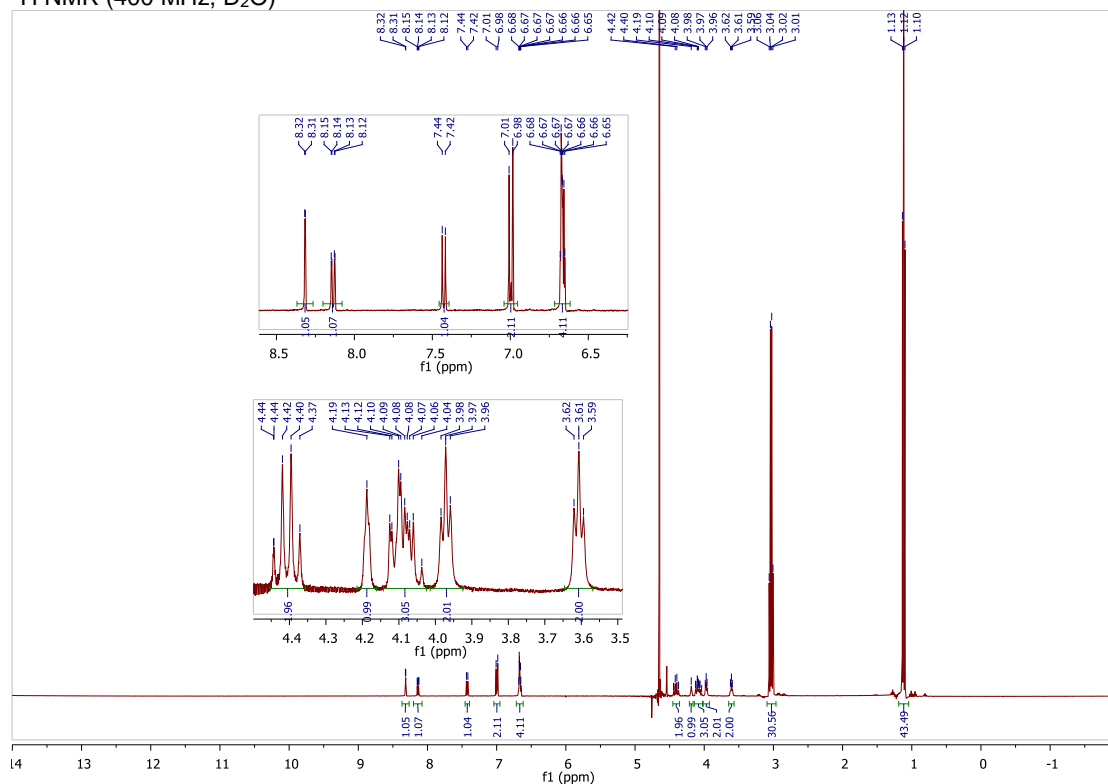

HPLC (5% to 70%  $\text{CH}_3\text{CN}$  in 0.1 M aqueous triethylammonium acetate, detection at 254 nm).

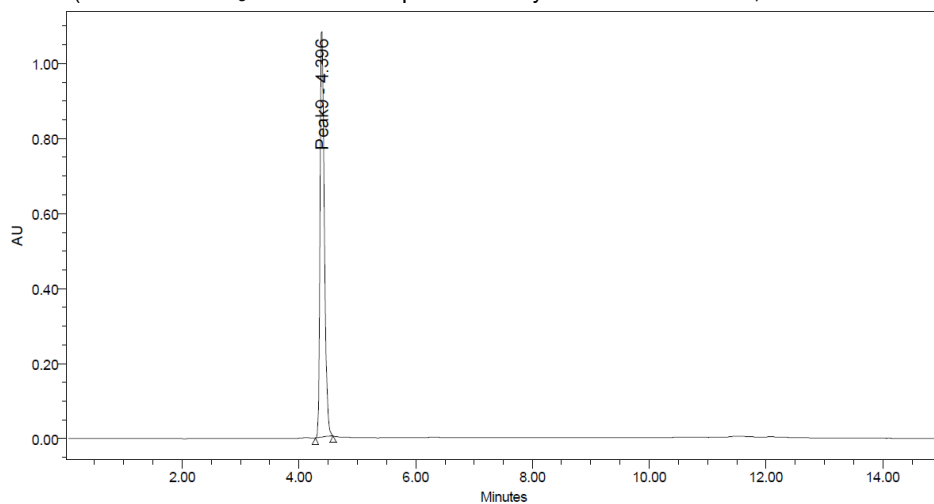

2-O-(2-(5-Fluoresceinylcarboxy)-aminoethyl)-*myo*-inositol 1,3,4,5,6-pentakisphosphate (5)

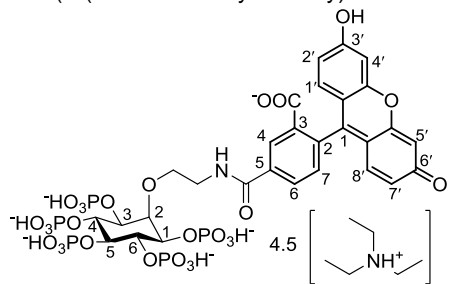

<sup>13</sup>C NMR (100MHz, D<sub>2</sub>O)

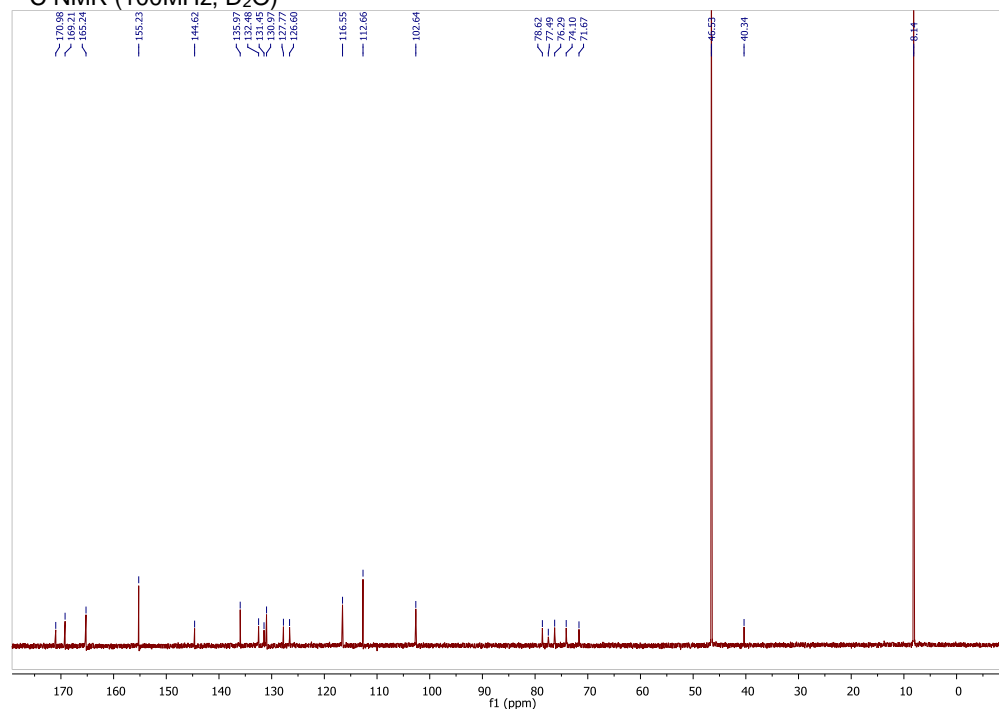

<sup>31</sup>P NMR (109 MHz, CD<sub>3</sub>OD)

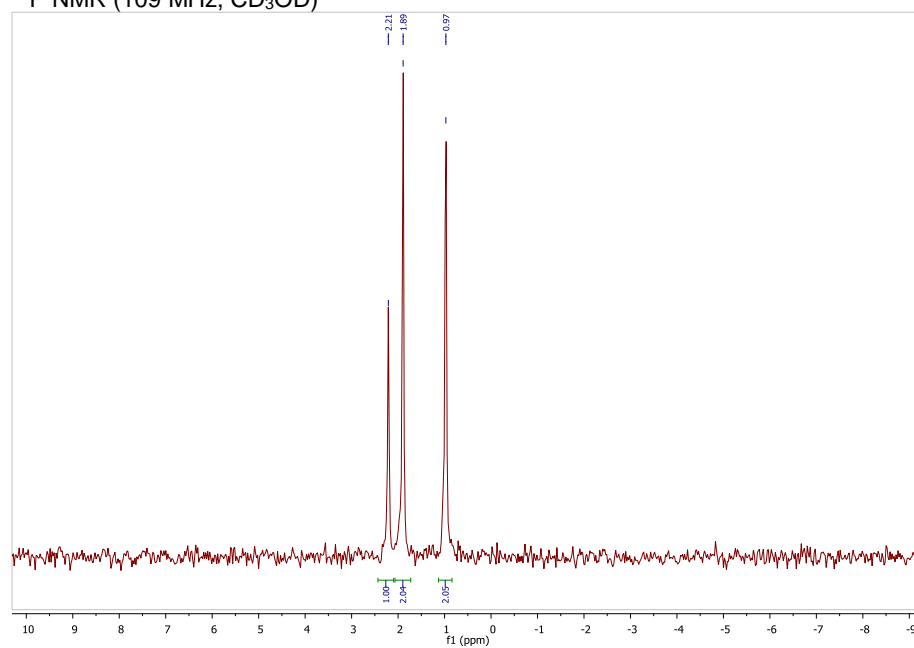

Supplement: cbic0015-0057-SD1.pdf [file cbic0015-0057-SD1.pdf]
